# Supplementary material for: Prognostic impact of NPM1 and FLT3 mutations in patients with AML in first remission treated with oral azacitidine
Source: PubMed Central journal article supplement — Blood. 2022 Aug 16;140(15):1674–85. doi: 10.1182/blood.2022016293 (PMC10653004; doi:10.1182/blood.2022016293), 2022-08-16

## SUPPLEMENTAL DATA

**Supplemental Table 1. Baseline demographic and disease characteristics by *NPM1* mutational status at AML diagnosis**

| Characteristic                                                                                                                                                                                                                                                                                                                                                                                                                                                                                                                                                                         | <i>NPM1</i> <sup>mut</sup><br>(n = 137) | <i>NPM1</i> <sup>wt</sup><br>(n = 332) | P value |
|----------------------------------------------------------------------------------------------------------------------------------------------------------------------------------------------------------------------------------------------------------------------------------------------------------------------------------------------------------------------------------------------------------------------------------------------------------------------------------------------------------------------------------------------------------------------------------------|-----------------------------------------|----------------------------------------|---------|
| <b>Age, years, median</b>                                                                                                                                                                                                                                                                                                                                                                                                                                                                                                                                                              | 68                                      | 68                                     | .245    |
| <b>Age category, n (%)</b>                                                                                                                                                                                                                                                                                                                                                                                                                                                                                                                                                             |                                         |                                        |         |
| 55-64 years                                                                                                                                                                                                                                                                                                                                                                                                                                                                                                                                                                            | 42 (30.7)                               | 92 (27.7)                              | .804    |
| 65-74 years                                                                                                                                                                                                                                                                                                                                                                                                                                                                                                                                                                            | 81 (59.1)                               | 203 (61.1)                             |         |
| ≥75 years                                                                                                                                                                                                                                                                                                                                                                                                                                                                                                                                                                              | 14 (10.2)                               | 37 (11.1)                              |         |
| <b>Sex, n (%)</b>                                                                                                                                                                                                                                                                                                                                                                                                                                                                                                                                                                      |                                         |                                        |         |
| Male                                                                                                                                                                                                                                                                                                                                                                                                                                                                                                                                                                                   | 60 (43.8)                               | 183 (55.1)                             | .033    |
| Female                                                                                                                                                                                                                                                                                                                                                                                                                                                                                                                                                                                 | 77 (56.2)                               | 149 (44.9)                             |         |
| <b>AML subtype, n (%)</b>                                                                                                                                                                                                                                                                                                                                                                                                                                                                                                                                                              |                                         |                                        |         |
| <i>de novo</i>                                                                                                                                                                                                                                                                                                                                                                                                                                                                                                                                                                         | 130 (94.9)                              | 296 (89.2)                             | .054    |
| Secondary                                                                                                                                                                                                                                                                                                                                                                                                                                                                                                                                                                              | 7 (5.1)                                 | 36 (10.8)                              |         |
| <b>NCCN cytogenetic risk at diagnosis, n (%)</b>                                                                                                                                                                                                                                                                                                                                                                                                                                                                                                                                       |                                         |                                        |         |
| Intermediate                                                                                                                                                                                                                                                                                                                                                                                                                                                                                                                                                                           | 132 (96.4)                              | 273 (82.2)                             | < .001  |
| Poor                                                                                                                                                                                                                                                                                                                                                                                                                                                                                                                                                                                   | 5 (3.6)                                 | 59 (17.8)                              |         |
| <b><i>FLT3</i>-ITD<sup>+</sup> or <i>FLT3</i>-TKD<sup>mut</sup> at diagnosis</b>                                                                                                                                                                                                                                                                                                                                                                                                                                                                                                       | 45 (32.8)                               | 21 (6.3)                               | < .001  |
| <b>Response after induction, n (%)</b>                                                                                                                                                                                                                                                                                                                                                                                                                                                                                                                                                 |                                         |                                        |         |
| CR                                                                                                                                                                                                                                                                                                                                                                                                                                                                                                                                                                                     | 119 (86.9)                              | 264 (79.5)                             | .067    |
| CRi                                                                                                                                                                                                                                                                                                                                                                                                                                                                                                                                                                                    | 18 (13.1)                               | 68 (20.5)                              |         |
| <b>Received consolidation after induction, n (%)</b>                                                                                                                                                                                                                                                                                                                                                                                                                                                                                                                                   |                                         |                                        |         |
| Yes                                                                                                                                                                                                                                                                                                                                                                                                                                                                                                                                                                                    | 120 (87.6)                              | 256 (77.1)                             | .011    |
| No                                                                                                                                                                                                                                                                                                                                                                                                                                                                                                                                                                                     | 17 (12.4)                               | 76 (22.9)                              |         |
| <b>ECOG PS score, n (%)</b>                                                                                                                                                                                                                                                                                                                                                                                                                                                                                                                                                            |                                         |                                        |         |
| 0                                                                                                                                                                                                                                                                                                                                                                                                                                                                                                                                                                                      | 65 (47.4)                               | 161 (48.5)                             | .498    |
| 1                                                                                                                                                                                                                                                                                                                                                                                                                                                                                                                                                                                      | 64 (46.7)                               | 142 (42.8)                             |         |
| 2-3                                                                                                                                                                                                                                                                                                                                                                                                                                                                                                                                                                                    | 8 (5.8)                                 | 29 (8.7)                               |         |
| <b>MRD negative* at screening, n/N (%)</b>                                                                                                                                                                                                                                                                                                                                                                                                                                                                                                                                             | 82/133 (61.7)                           | 160/327 (48.9)                         | .014    |
| <p>*MRD determined at study entry by MFC using a “different-from-normal” method with a 0.1% positivity threshold.</p> <p>AML, acute myeloid leukemia; CR, complete remission; CRi, CR with incomplete hematologic recovery; ECOG PS, Eastern Cooperative Oncology Group performance status; <i>FLT3</i>, fms-like tyrosine kinase 3; ITD, internal tandem duplication; MFC, multiparameter flow cytometry; MRD, measurable residual disease; mut, mutation; NCCN, National Comprehensive Cancer Network; <i>NPM1</i>, nucleophosmin 1; TKD, tyrosine kinase domain; wt, wild type.</p> |                                         |                                        |         |

**Supplemental Table 2. Baseline characteristics for patients with an *NPM1* mutation at AML diagnosis, by randomized treatment arm**

| Characteristic                                                                                                                                                                                                                                                                                                                                                                                                                                                                                                                                                                            | Oral-AZA<br><i>NPM1</i> <sup>mut</sup><br>(n = 66) | Placebo<br><i>NPM1</i> <sup>mut</sup><br>(n = 71) | P value |
|-------------------------------------------------------------------------------------------------------------------------------------------------------------------------------------------------------------------------------------------------------------------------------------------------------------------------------------------------------------------------------------------------------------------------------------------------------------------------------------------------------------------------------------------------------------------------------------------|----------------------------------------------------|---------------------------------------------------|---------|
| <b>Age, years, median</b>                                                                                                                                                                                                                                                                                                                                                                                                                                                                                                                                                                 | 68                                                 | 68                                                | .799    |
| <b>Age category, n (%)</b>                                                                                                                                                                                                                                                                                                                                                                                                                                                                                                                                                                |                                                    |                                                   |         |
| 55-64 years                                                                                                                                                                                                                                                                                                                                                                                                                                                                                                                                                                               | 20 (30.3)                                          | 22 (31.0)                                         | .900    |
| 65-74 years                                                                                                                                                                                                                                                                                                                                                                                                                                                                                                                                                                               | 40 (60.6)                                          | 41 (57.7)                                         |         |
| ≥75 years                                                                                                                                                                                                                                                                                                                                                                                                                                                                                                                                                                                 | 6 (9.1)                                            | 8 (11.3)                                          |         |
| <b>Sex, n (%)</b>                                                                                                                                                                                                                                                                                                                                                                                                                                                                                                                                                                         |                                                    |                                                   |         |
| Male                                                                                                                                                                                                                                                                                                                                                                                                                                                                                                                                                                                      | 26 (39.4)                                          | 34 (47.9)                                         | .389    |
| Female                                                                                                                                                                                                                                                                                                                                                                                                                                                                                                                                                                                    | 40 (60.6)                                          | 37 (52.1)                                         |         |
| <b>AML subtype, n (%)</b>                                                                                                                                                                                                                                                                                                                                                                                                                                                                                                                                                                 |                                                    |                                                   |         |
| <i>de novo</i>                                                                                                                                                                                                                                                                                                                                                                                                                                                                                                                                                                            | 64 (97.0)                                          | 66 (93.0)                                         | .443    |
| Secondary                                                                                                                                                                                                                                                                                                                                                                                                                                                                                                                                                                                 | 2 (3.0)                                            | 5 (7.0)                                           |         |
| <b>NCCN cytogenetic risk at diagnosis, n (%)</b>                                                                                                                                                                                                                                                                                                                                                                                                                                                                                                                                          |                                                    |                                                   |         |
| Intermediate                                                                                                                                                                                                                                                                                                                                                                                                                                                                                                                                                                              | 64 (97.0)                                          | 68 (95.8)                                         | 1.0     |
| Poor                                                                                                                                                                                                                                                                                                                                                                                                                                                                                                                                                                                      | 2 (3.0)                                            | 3 (4.2)                                           |         |
| <b><i>FLT3</i>-ITD<sup>+</sup> or <i>FLT3</i>-TKD<sup>mut</sup> at diagnosis</b>                                                                                                                                                                                                                                                                                                                                                                                                                                                                                                          | 20 (30.3)                                          | 25 (35.2)                                         | .588    |
| <b>Response after induction, n (%)</b>                                                                                                                                                                                                                                                                                                                                                                                                                                                                                                                                                    |                                                    |                                                   |         |
| CR                                                                                                                                                                                                                                                                                                                                                                                                                                                                                                                                                                                        | 57 (86.4)                                          | 62 (87.3)                                         | 1.0     |
| CRi                                                                                                                                                                                                                                                                                                                                                                                                                                                                                                                                                                                       | 9 (13.6)                                           | 9 (12.7)                                          |         |
| <b>Received consolidation after induction, n (%)</b>                                                                                                                                                                                                                                                                                                                                                                                                                                                                                                                                      |                                                    |                                                   |         |
| Yes                                                                                                                                                                                                                                                                                                                                                                                                                                                                                                                                                                                       | 58 (87.9)                                          | 62 (87.3)                                         | 1.0     |
| No                                                                                                                                                                                                                                                                                                                                                                                                                                                                                                                                                                                        | 8 (12.1)                                           | 9 (12.7)                                          |         |
| <b>ECOG PS score, n (%)</b>                                                                                                                                                                                                                                                                                                                                                                                                                                                                                                                                                               |                                                    |                                                   |         |
| 0                                                                                                                                                                                                                                                                                                                                                                                                                                                                                                                                                                                         | 35 (53.0)                                          | 30 (42.3)                                         | .228    |
| 1                                                                                                                                                                                                                                                                                                                                                                                                                                                                                                                                                                                         | 26 (39.4)                                          | 38 (53.5)                                         |         |
| 2-3                                                                                                                                                                                                                                                                                                                                                                                                                                                                                                                                                                                       | 5 (7.6)                                            | 3 (4.2)                                           |         |
| <b>MRD negative* at screening, n/N (%)</b>                                                                                                                                                                                                                                                                                                                                                                                                                                                                                                                                                | 39/66 (59.0)                                       | 42/67 (62.7)                                      | .721    |
| <p>*MRD determined at study entry by MFC using a “different-from-normal” method with a 0.1% positivity threshold.</p> <p>AML, acute myeloid leukemia; AZA, azacitidine; CR, complete remission; CRi, CR with incomplete hematologic recovery; ECOG PS, Eastern Cooperative Oncology Group performance status; <i>FLT3</i>, fms-like tyrosine kinase 3; ITD, internal tandem duplication; MFC, multiparameter flow cytometry; MRD, measurable residual disease; mut, mutation; NCCN, National Comprehensive Cancer Network; <i>NPM1</i>, nucleophosmin 1; TKD, tyrosine kinase domain.</p> |                                                    |                                                   |         |

**Supplemental Table 3. Impact of *NPM1* and *FLT3* mutational status at AML diagnosis on OS and RFS from randomization within randomized treatment arms**

|                                                                                                                                                                                                                                                        | Mutation  | Wild type  | OS, mutation vs wild type         | RFS, mutation vs wild type        |
|--------------------------------------------------------------------------------------------------------------------------------------------------------------------------------------------------------------------------------------------------------|-----------|------------|-----------------------------------|-----------------------------------|
|                                                                                                                                                                                                                                                        | n (%)     |            | HR (95% CI); P value              |                                   |
| <b>Oral-AZA, n = 236</b>                                                                                                                                                                                                                               |           |            |                                   |                                   |
| <b>Gene</b>                                                                                                                                                                                                                                            |           |            |                                   |                                   |
| <i>NPM1</i>                                                                                                                                                                                                                                            | 66 (28.0) | 170 (72.0) | 0.52 (0.36-0.75); <i>P</i> < .001 | 0.46 (0.31-0.66); <i>P</i> < .001 |
| <i>FLT3</i> *                                                                                                                                                                                                                                          | 30 (12.7) | 206 (87.3) | 0.96 (0.60-1.54); <i>P</i> = .871 | 0.62 (0.37-1.05); <i>P</i> = .071 |
| <i>FLT3</i> -ITD                                                                                                                                                                                                                                       | 21 (8.9)  | 215 (91.1) | 1.10 (0.65-1.88); <i>P</i> = .715 | 0.72 (0.39-1.32); <i>P</i> = .285 |
| <i>FLT3</i> -TKD                                                                                                                                                                                                                                       | 11 (4.7)  | 225 (95.3) | 0.84 (0.39-1.79); <i>P</i> = .648 | 0.69 (0.32-1.48); <i>P</i> = .329 |
| <b>Placebo, n = 233</b>                                                                                                                                                                                                                                |           |            |                                   |                                   |
| <b>Gene</b>                                                                                                                                                                                                                                            |           |            |                                   |                                   |
| <i>NPM1</i>                                                                                                                                                                                                                                            | 71 (30.5) | 162 (69.5) | 0.69 (0.49-0.97); <i>P</i> = .032 | 0.65 (0.47-0.91); <i>P</i> = .011 |
| <i>FLT3</i> *                                                                                                                                                                                                                                          | 36 (15.5) | 197 (84.5) | 1.25 (0.83-1.89); <i>P</i> = .280 | 1.07 (0.71-1.61); <i>P</i> = .76  |
| <i>FLT3</i> -ITD                                                                                                                                                                                                                                       | 25 (10.7) | 208 (89.3) | 1.25 (0.78-2.02); <i>P</i> = .351 | 1.13 (0.70-1.82); <i>P</i> = .594 |
| <i>FLT3</i> -TKD                                                                                                                                                                                                                                       | 13 (5.6)  | 220 (94.4) | 1.03 (0.68-2.46); <i>P</i> = .422 | 1.01 (0.53-1.90); <i>P</i> = .996 |
| *Includes <i>FLT3</i> -ITD and <i>FLT3</i> -TKD.                                                                                                                                                                                                       |           |            |                                   |                                   |
| AZA, azacitidine; CI, confidence interval; <i>FLT3</i> , fms-like tyrosine kinase 3; HR, hazard ratio; ITD, internal tandem duplication; <i>NPM1</i> , nucleophosmin 1; OS, overall survival; RFS, relapse-free survival; TKD, tyrosine kinase domain. |           |            |                                   |                                   |

**Supplemental Table 4. Impact of Oral-AZA vs placebo on OS and RFS from time of randomization in patients with *NPM1* or *FLT3* mutations at AML diagnosis**

|                                                                                                                                                                                                                                                                                                                                                                             | Oral-AZA,<br>n | Placebo,<br>n | OS, Oral-AZA vs placebo<br>HR (95% CI); <i>P</i> value | RFS, Oral-AZA vs placebo<br>HR (95% CI); <i>P</i> value |
|-----------------------------------------------------------------------------------------------------------------------------------------------------------------------------------------------------------------------------------------------------------------------------------------------------------------------------------------------------------------------------|----------------|---------------|--------------------------------------------------------|---------------------------------------------------------|
| <b>Gene mutation</b>                                                                                                                                                                                                                                                                                                                                                        |                |               |                                                        |                                                         |
| <i>NPM1</i> <sup>mut</sup> , n = 137                                                                                                                                                                                                                                                                                                                                        | 66             | 71            | 0.63 (0.41-0.98); <i>P</i> = .038                      | 0.55 (0.35-0.84); <i>P</i> = .005                       |
| <i>FLT3</i> <sup>mut</sup> , n = 66*                                                                                                                                                                                                                                                                                                                                        | 30             | 36            | 0.63 (0.35-1.12); <i>P</i> = .114                      | 0.51 (0.27-0.95); <i>P</i> = .032                       |
| <i>FLT3</i> -ITD <sup>+</sup> , n = 46                                                                                                                                                                                                                                                                                                                                      | 21             | 25            | 0.68 (0.34-1.35); <i>P</i> = .270                      | 0.54 (0.25-1.14); <i>P</i> = .099                       |
| <i>FLT3</i> -TKD <sup>mut</sup> , n = 24                                                                                                                                                                                                                                                                                                                                    | 11             | 13            | 0.55 (0.21-1.46); <i>P</i> = .223                      | 0.54 (0.20-1.44); <i>P</i> = .202                       |
| *4 patients had both <i>FLT3</i> -ITD and <i>FLT3</i> -TKD mutations.<br>AML, acute myeloid leukemia; AZA, azacitidine; CI, confidence interval; <i>FLT3</i> , fms-like tyrosine kinase 3; HR, hazard ratio; ITD, internal tandem duplication; mut, mutation; <i>NPM1</i> , nucleophosmin 1; OS, overall survival; RFS, relapse-free survival; TKD, tyrosine kinase domain. |                |               |                                                        |                                                         |

Supplemental Table 5. Baseline demographic and disease characteristics by *FLT3* mutational status at AML diagnosis

| Characteristic                                 | <i>FLT3</i> <sup>mut</sup><br>(n = 66) | <i>FLT3</i> <sup>wt</sup><br>(n = 403) | P value |
|------------------------------------------------|----------------------------------------|----------------------------------------|---------|
| Age, median, years                             | 67                                     | 69                                     | .023    |
| Age category, n (%)                            |                                        |                                        |         |
| 55-64 years                                    | 24 (36.4)                              | 110 (27.3)                             | .395    |
| 65-74 years                                    | 37 (56.1)                              | 247 (50.4)                             |         |
| ≥75 years                                      | 5 (7.6)                                | 46 (11.4)                              |         |
| Sex, n (%)                                     |                                        |                                        |         |
| Male                                           | 29 (43.9)                              | 214 (53.1)                             | .185    |
| Female                                         | 37 (56.1)                              | 189 (46.9)                             |         |
| AML subtype, n (%)                             |                                        |                                        |         |
| <i>de novo</i>                                 | 63 (95.5)                              | 363 (90.1)                             | .247    |
| Secondary                                      | 3 (4.5)                                | 40 (9.9)                               |         |
| NCCN cytogenetic risk at diagnosis, n (%)      |                                        |                                        |         |
| Intermediate                                   | 63 (95.5)                              | 342 (84.9)                             | .019    |
| Poor                                           | 3 (4.5)                                | 61 (15.1)                              |         |
| <i>NPM1</i> <sup>mut</sup> at diagnosis, n (%) | 45 (68.2)                              | 92 (22.8)                              | < .001  |
| Response after induction, n (%)                |                                        |                                        |         |
| CR                                             | 56 (84.8)                              | 327 (81.1)                             | .607    |
| CRi                                            | 10 (15.2)                              | 76 (18.9)                              |         |
| Received consolidation after induction, n (%)  |                                        |                                        |         |
| Yes                                            | 59 (89.4)                              | 317 (78.7)                             | .046    |
| No                                             | 7 (10.6)                               | 86 (21.3)                              |         |
| ECOG PS score, n (%)                           |                                        |                                        |         |
| 0                                              | 22 (33.3)                              | 204 (50.6)                             | .027    |
| 1                                              | 36 (54.5)                              | 170 (42.2)                             |         |
| 2-3                                            | 8 (12.1)                               | 29 (7.2)                               |         |
| MRD-negative at screening, n/N (%)             | 32/65 (49.2)                           | 210/395 (53.2)                         | .593    |

AML, acute myeloid leukemia; CR, complete remission; CRi, CR with incomplete hematologic recovery; ECOG PS, Eastern Cooperative Oncology Group performance status; *FLT3*, fms-like tyrosine kinase 3; MRD, measurable residual disease; mut, mutation; NCCN, National Comprehensive Cancer Network; wt, wild type.

**Supplemental Table 6. Baseline characteristics for patients with a *FLT3* mutation at AML diagnosis, by randomized treatment arm**

| Characteristic                                                                                                                                                                                                                                                                                                                                                                                                                                                                                              | Oral-AZA<br><i>FLT3</i> <sup>mut</sup><br>(n = 30) | Placebo<br><i>FLT3</i> <sup>mut</sup><br>(n = 36) | P value |
|-------------------------------------------------------------------------------------------------------------------------------------------------------------------------------------------------------------------------------------------------------------------------------------------------------------------------------------------------------------------------------------------------------------------------------------------------------------------------------------------------------------|----------------------------------------------------|---------------------------------------------------|---------|
| <b>Age, years, median</b>                                                                                                                                                                                                                                                                                                                                                                                                                                                                                   | 67                                                 | 67                                                | .931    |
| <b>Age category, n (%)</b>                                                                                                                                                                                                                                                                                                                                                                                                                                                                                  |                                                    |                                                   |         |
| 55-64 years                                                                                                                                                                                                                                                                                                                                                                                                                                                                                                 | 10 (33.3)                                          | 14 (38.9)                                         | .752    |
| 65-74 years                                                                                                                                                                                                                                                                                                                                                                                                                                                                                                 | 17 (56.7)                                          | 20 (55.6)                                         |         |
| ≥75 years                                                                                                                                                                                                                                                                                                                                                                                                                                                                                                   | 3 (10.0)                                           | 2 (5.6)                                           |         |
| <b>Sex, n (%)</b>                                                                                                                                                                                                                                                                                                                                                                                                                                                                                           |                                                    |                                                   |         |
| Male                                                                                                                                                                                                                                                                                                                                                                                                                                                                                                        | 12 (40.0)                                          | 17 (47.2)                                         | .623    |
| Female                                                                                                                                                                                                                                                                                                                                                                                                                                                                                                      | 18 (60.0)                                          | 19 (52.8)                                         |         |
| <b>AML subtype, n (%)</b>                                                                                                                                                                                                                                                                                                                                                                                                                                                                                   |                                                    |                                                   |         |
| <i>de novo</i>                                                                                                                                                                                                                                                                                                                                                                                                                                                                                              | 30 (100.0)                                         | 33 (91.7)                                         | .245    |
| Secondary                                                                                                                                                                                                                                                                                                                                                                                                                                                                                                   | 0 (0.0)                                            | 3 (8.3)                                           |         |
| <b>NCCN cytogenetic risk at diagnosis, n (%)</b>                                                                                                                                                                                                                                                                                                                                                                                                                                                            |                                                    |                                                   |         |
| Intermediate                                                                                                                                                                                                                                                                                                                                                                                                                                                                                                | 29 (96.7)                                          | 34 (94.4)                                         | 1.0     |
| Poor                                                                                                                                                                                                                                                                                                                                                                                                                                                                                                        | 1 (3.3)                                            | 2 (5.6)                                           |         |
| <b><i>NPM1</i><sup>mut</sup> at diagnosis</b>                                                                                                                                                                                                                                                                                                                                                                                                                                                               | 20 (66.7)                                          | 25 (69.4)                                         | 1.0     |
| <b>Response after induction, n (%)</b>                                                                                                                                                                                                                                                                                                                                                                                                                                                                      |                                                    |                                                   |         |
| CR                                                                                                                                                                                                                                                                                                                                                                                                                                                                                                          | 24 (80.0)                                          | 32 (88.9)                                         | 1.0     |
| CRi                                                                                                                                                                                                                                                                                                                                                                                                                                                                                                         | 6 (20.0)                                           | 4 (11.1)                                          |         |
| <b>Received consolidation after induction, n (%)</b>                                                                                                                                                                                                                                                                                                                                                                                                                                                        |                                                    |                                                   |         |
| Yes                                                                                                                                                                                                                                                                                                                                                                                                                                                                                                         | 27 (90.0)                                          | 32 (88.9)                                         | 1.0     |
| No                                                                                                                                                                                                                                                                                                                                                                                                                                                                                                          | 3 (10.0)                                           | 4 (11.1)                                          |         |
| <b>ECOG PS score, n (%)</b>                                                                                                                                                                                                                                                                                                                                                                                                                                                                                 |                                                    |                                                   |         |
| 0                                                                                                                                                                                                                                                                                                                                                                                                                                                                                                           | 13 (43.3)                                          | 9 (25.0)                                          | .289    |
| 1                                                                                                                                                                                                                                                                                                                                                                                                                                                                                                           | 14 (46.7)                                          | 22 (61.1)                                         |         |
| 2-3                                                                                                                                                                                                                                                                                                                                                                                                                                                                                                         | 3 (10.0)                                           | 5 (13.9)                                          |         |
| <b>MRD negative* at screening, n/N (%)</b>                                                                                                                                                                                                                                                                                                                                                                                                                                                                  | 14/30 (46.7)                                       | 18/35 (51.4)                                      | 1.0     |
| <p>*MRD determined at study entry by MFC using a “different-from-normal” method with a 0.1% positivity threshold.</p> <p>AML, acute myeloid leukemia; AZA, azacitidine; CR, complete remission; CRi, CR with incomplete hematologic recovery; ECOG PS, Eastern Cooperative Oncology Group performance status; <i>FLT3</i>, fms-like tyrosine kinase 3; MFC, multiparameter flow cytometry; MRD, measurable residual disease; NCCN, National Comprehensive Cancer Network; <i>NPM1</i>, nucleophosmin 1.</p> |                                                    |                                                   |         |

**Supplemental Figure 1. Treatment allocations and *NPM1/FLT3* mutational status at diagnosis in the biomarker cohort (n = 469).** The biomarker cohort included patients with mutational data available from the time of AML diagnosis. *FLT3*<sup>mut</sup> includes *FLT3*-ITD<sup>+</sup> and *FLT3*-TKD<sup>mut</sup>. AML, acute myeloid leukemia; AZA, azacitidine; *FLT3*, fms-like tyrosine kinase 3; ITD, internal tandem duplication; mut, mutation; *NPM1*, nucleophosmin 1; TKD, tyrosine kinase domain.

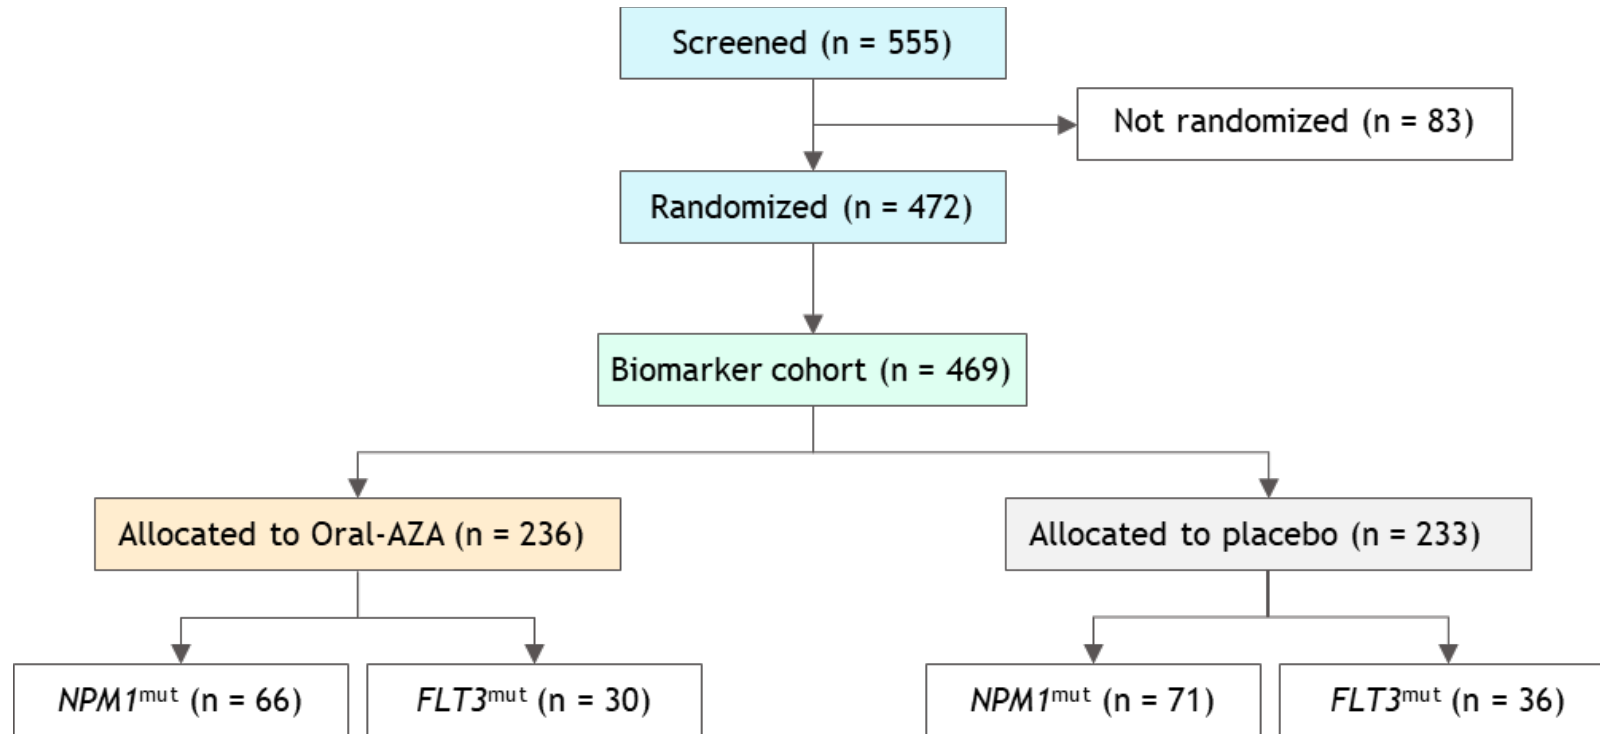

Supplement: BLOOD_BLD-2022-016293-mmc1.pdf [file BLOOD_BLD-2022-016293-mmc1.pdf]
